# Supplementary material for: Buried interface engineering enables efficient and refurbished CsPbI 3 perovskite quantum dot solar cells
Source: Royal Society of Chemistry journal article supplement (doi:10.1039/d4ee04628e), 2024-11-28
Supplement: d4ee04628e1.pdf [file d4ee04628e1.pdf]

## Supplemental Information

### **Buried interface engineering enables efficient and refurbished CsPbI<sub>3</sub> perovskite quantum dot solar cells**

Huifeng Li,<sup>1</sup> Hehe Huang,<sup>1</sup> Du Li,<sup>1</sup> Xuliang Zhang,<sup>1,2</sup> Chenyu Zhao,<sup>1</sup> Xinyu Zhao,<sup>1</sup> Wanli Ma<sup>1,3\*</sup> and Jianyu Yuan<sup>1,2\*</sup>

<sup>1</sup>*Institute of Functional Nano & Soft Materials (FUNSOM), Soochow University, 199 Ren-Ai Road, Suzhou Industrial Park, Suzhou, Jiangsu 215123, P. R. China.*

<sup>2</sup>*Jiangsu Key Laboratory of Advanced Negative Carbon Technologies, Soochow University, 199 Ren-Ai Road, Suzhou Industrial Park, Suzhou, Jiangsu 215123, P. R. China.*

<sup>3</sup>*Jiangsu Key Laboratory for Carbon-Based Functional Materials and Devices, Soochow University, 199 Ren-Ai Road, Suzhou Industrial Park, Suzhou, Jiangsu 215123*

\*Corresponding author: [wlma@suda.edu.cn](mailto:wlma@suda.edu.cn) (W.M.); [jyyuan@suda.edu.cn](mailto:jyyuan@suda.edu.cn) (J.Y.)

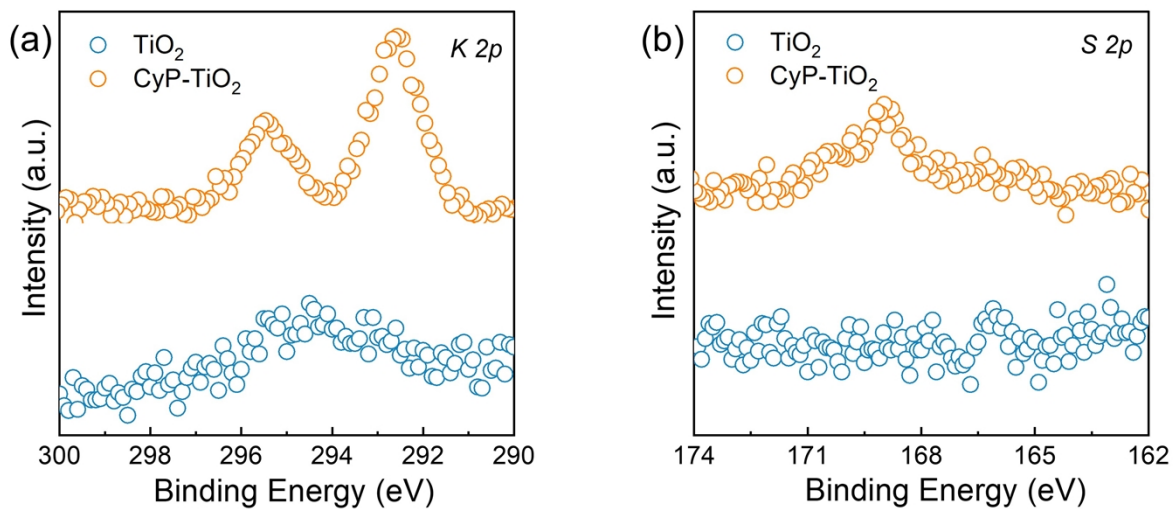

Fig. S1 (a-b) K 2p, and S 2p XPS spectra of TiO<sub>2</sub> and CyP-coated TiO<sub>2</sub> films.

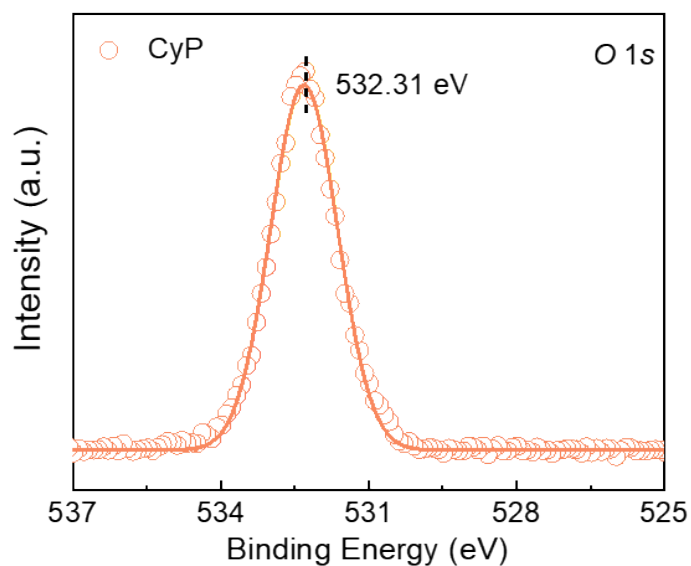

Fig. S2 O 1s XPS spectra of CyP molecule.

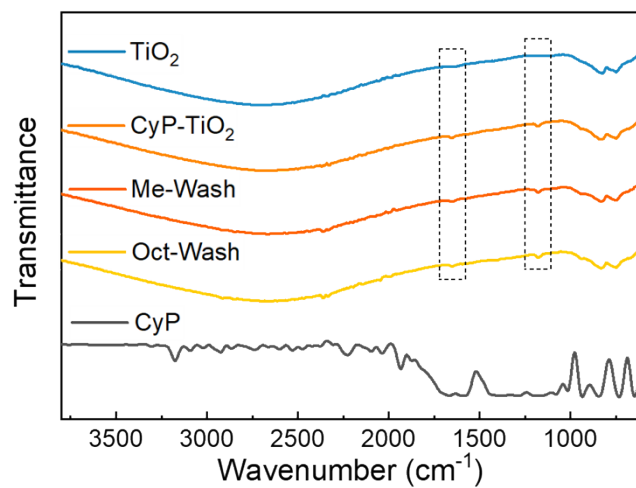

Fig. S3 The full FTIR spectra of  $\text{TiO}_2$ ,  $\text{CyP-TiO}_2$ , Methyl acetate washed  $\text{TiO}_2$ , Octane washed  $\text{TiO}_2$ , and CyP samples.

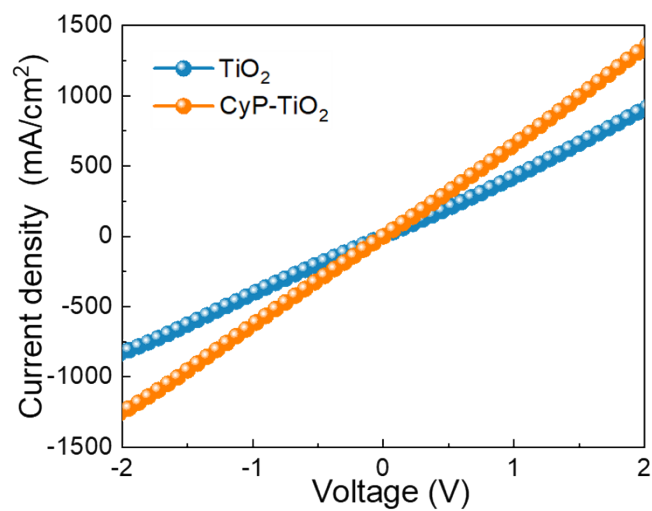

Fig. S4  $J-V$  curves of devices structured as FTO/ETLs/Ag.

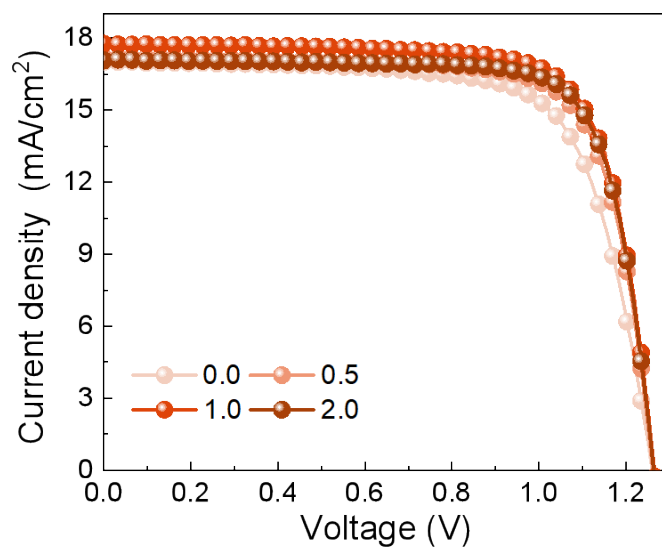

Fig. S5  $J-V$  curves of CyP-engineered CsPbI<sub>3</sub> QD solar cells with different concentrations of CyP.

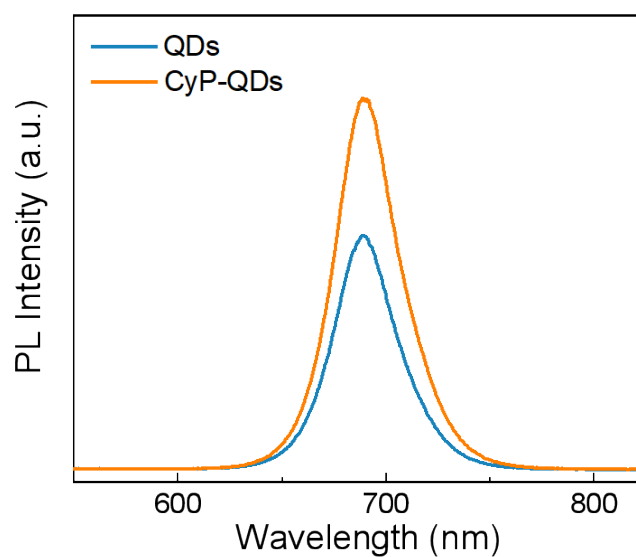

Fig. S6 Steady PL spectra of QD films deposited on quartz substrates with and without CyP modification layer.

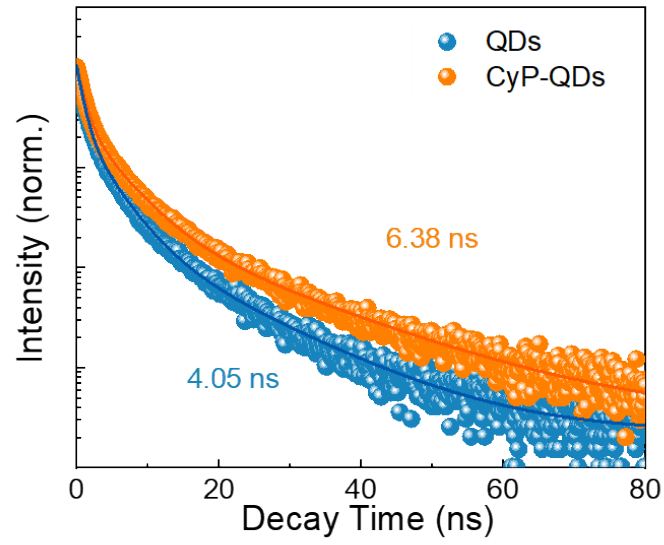

Fig. S7 TRPL spectra of QD films deposited on quartz substrates with and without CyP modification layer.

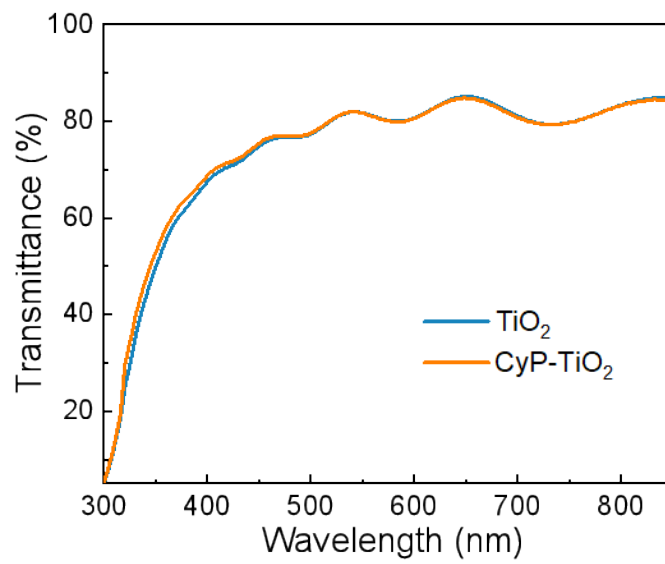

Fig. S8 Optical transmittance spectra of TiO<sub>2</sub>/FTO and CyP-TiO<sub>2</sub>/FTO films.

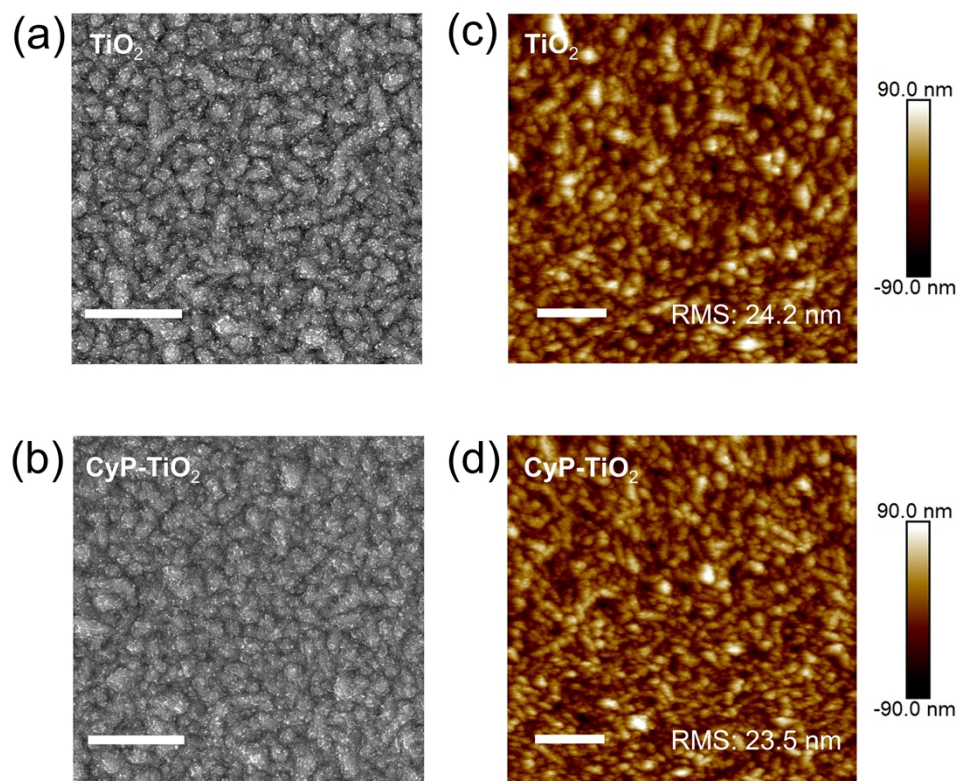

Fig. S9 (a-b) Top-view SEM images (scale bar is  $1\mu\text{m}$ ), (c-d) AFM images (scale bar is  $1\mu\text{m}$ ) of  $\text{TiO}_2$  and  $\text{CyP-TiO}_2$  films, respectively.

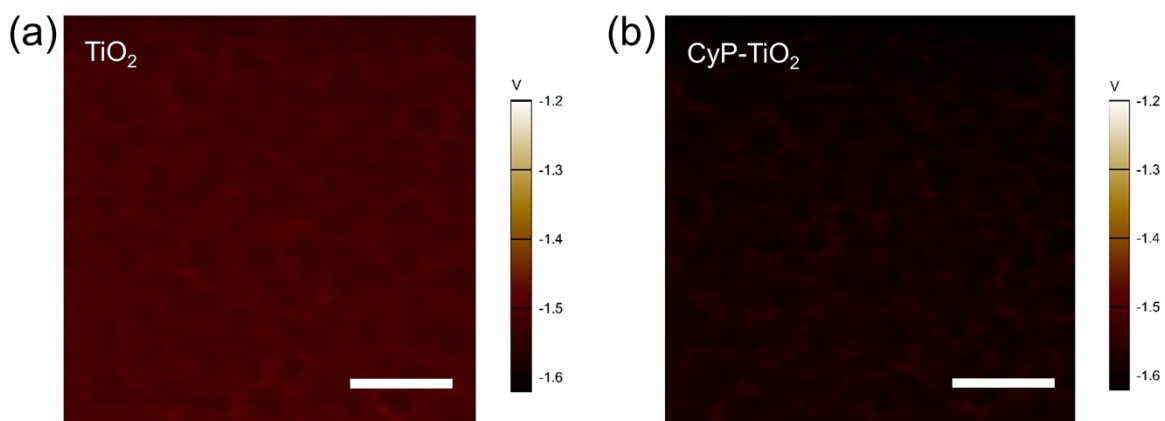

Fig. S10 (a-b) KPFM images of  $\text{TiO}_2$  and  $\text{CyP-TiO}_2$  films. (scale bar is 500 nm).

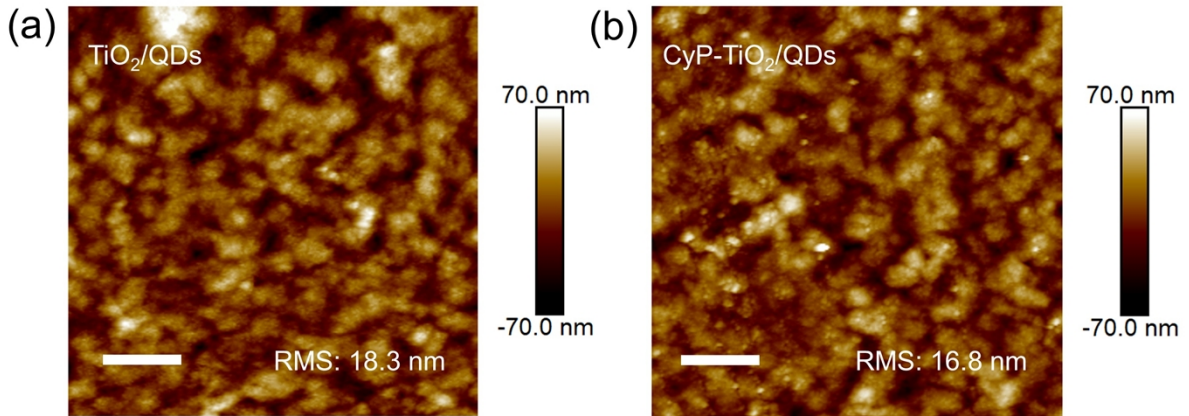

Fig. S11 (a-b) The AFM images (scale bar is 1  $\mu\text{m}$ ) of QD films deposited on the  $\text{TiO}_2$  and  $\text{CyP-TiO}_2$  films.

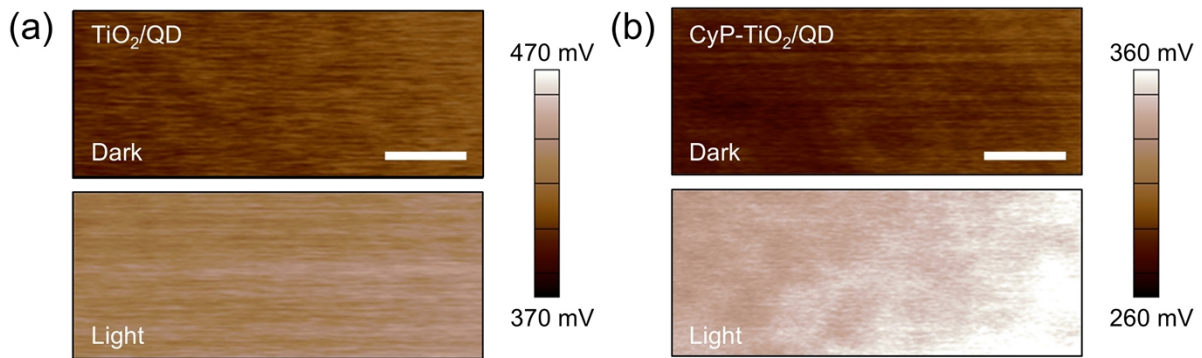

Fig. S12 (a) Surface potential mapping measured in the dark (average surface potential: 401.30 mV) and light (average surface potential: 434.24 mV) for QD film deposition on  $\text{TiO}_2$ , respectively. (b) Surface potential mapping measured in the dark (average surface potential: 288.27 mV) and light (average surface potential: 348.58 mV) for QD film deposition on  $\text{CyP-TiO}_2$ , respectively, the scale bar is 1  $\mu\text{m}$ .

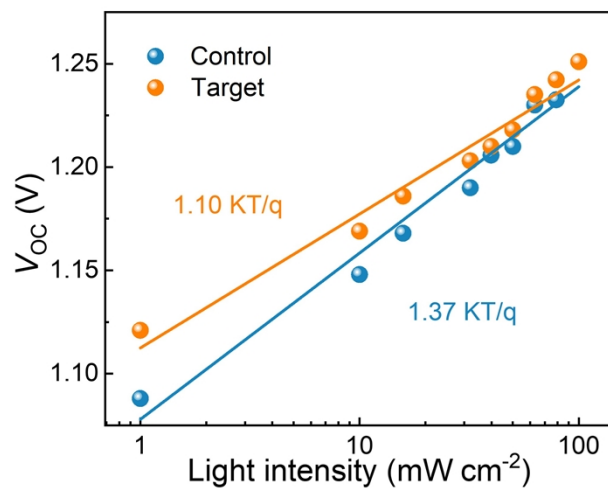

Fig. S13 The double-logarithmic  $I$  dependent  $V_{\text{OC}}$  curves of control and target cells.



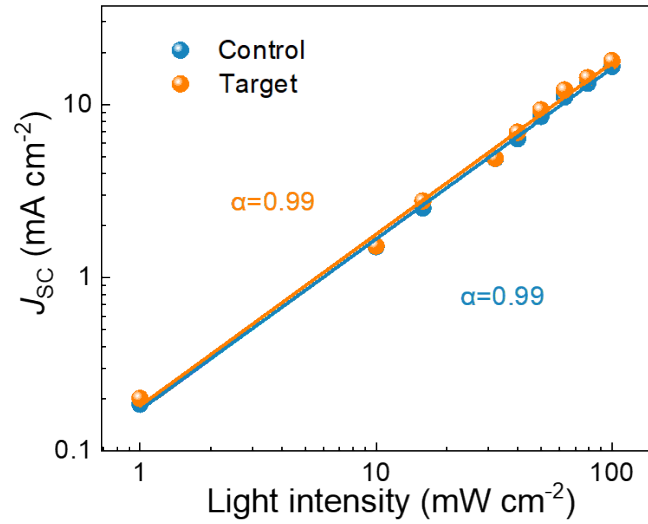

Fig. S14 The double-logarithmic  $I$  dependent  $J_{SC}$  curves of control and target cells.

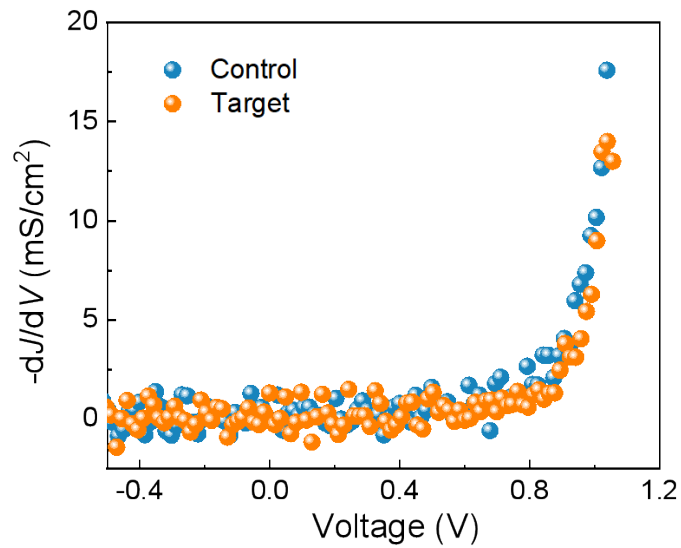

Fig. S15 The relationship of  $-dJ/dV$  with respect to voltage, which was derived from Fig. 2b.

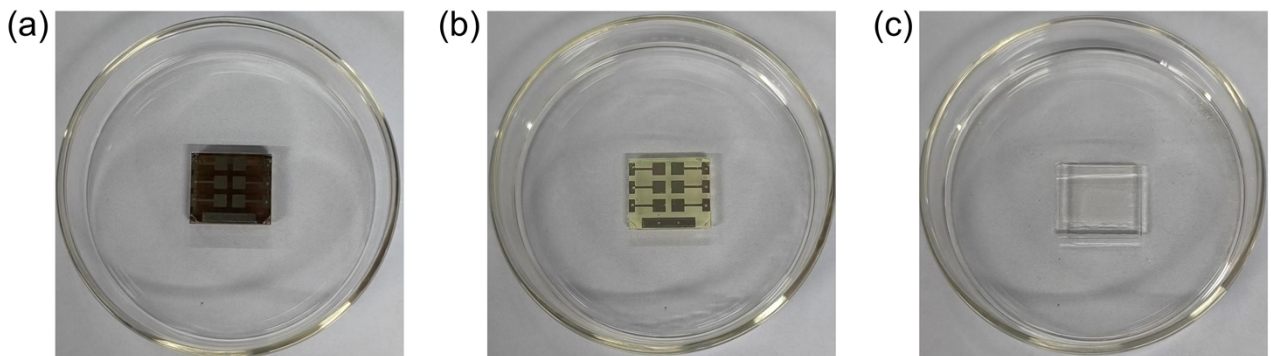

Fig. S16 Photographs of the process of recycling  $TiO_2/FTO$ . (a) Aged  $CsPbI_3$  QD solar cells. (b) Aged solar cell after contacting with acetone solvent. (c) Clean  $TiO_2/FTO$  after ultrasound treatment.



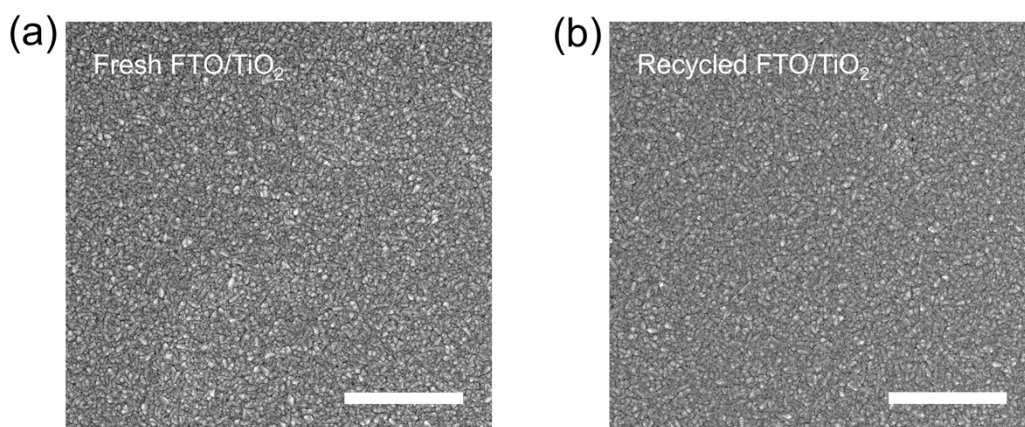

Fig. S17 (a-b) Top-view SEM images of fresh TiO<sub>2</sub>/FTO and recycled TiO<sub>2</sub>/FTO. (scale bar is 5 μm).

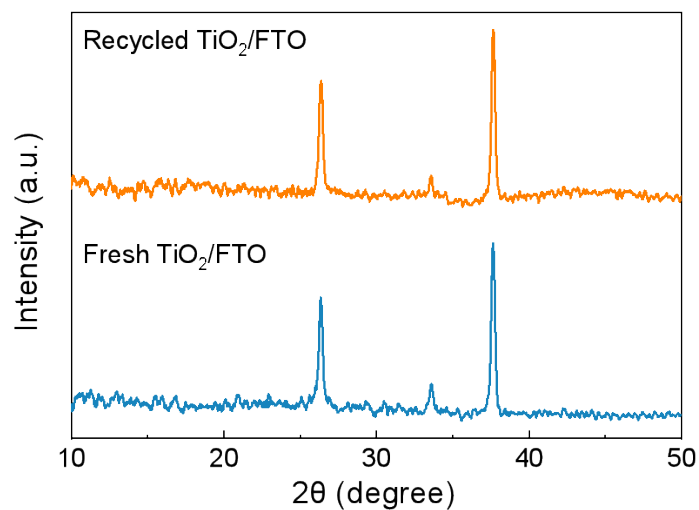

Fig. S18 XRD patterns of fresh TiO<sub>2</sub>/FTO substrate and recycled TiO<sub>2</sub>/FTO substrate.

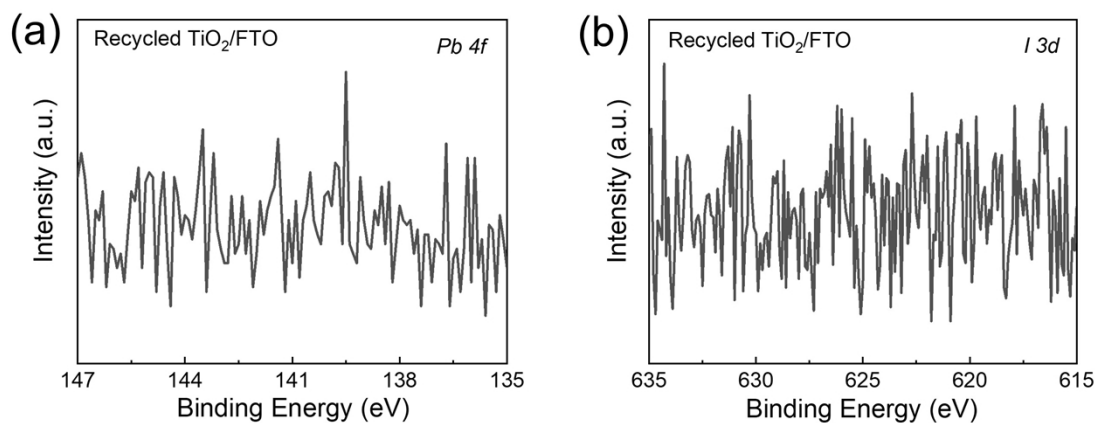

Fig. S19 Pb 4*f* (a) and I 3*d* (b) XPS spectra of recycled TiO<sub>2</sub>/FTO electrode.

Table S1 The detailed *J-V* parameters of CyP-engineered CsPbI<sub>3</sub> QD solar cells with different

concentrations of CyP.

| Sample    | $V_{OC}$ (V) | $J_{SC}$ (mA cm <sup>-2</sup> ) | FF    | PCE (%) |
|-----------|--------------|---------------------------------|-------|---------|
| 0.0 mg/mL | 1.251        | 16.99                           | 0.724 | 15.39   |
| 0.5 mg/mL | 1.251        | 17.19                           | 0.762 | 16.39   |
| 1.0 mg/mL | 1.251        | 17.75                           | 0.771 | 17.13   |
| 2.0 mg/mL | 1.251        | 17.08                           | 0.784 | 16.75   |

Table S2 The detailed  $J-V$  parameters of performance for control and target devices.

| Sample         | Scan direction         | $V_{OC}$ (V) | $J_{SC}$ (mA cm <sup>-2</sup> ) | FF          | PCE (%)    |
|----------------|------------------------|--------------|---------------------------------|-------------|------------|
| <b>Control</b> | Forward                | 1.268        | 16.47                           | 0.739       | 15.42      |
|                | Reverse                | 1.251        | 16.76                           | 0.748       | 15.70      |
|                | Average <sup>[a]</sup> | 1.245±0.015  | 16.30±0.47                      | 0.743±0.018 | 15.19±0.35 |
| <b>Target</b>  | Forward                | 1.268        | 17.89                           | 0.763       | 17.30      |
|                | Reverse                | 1.251        | 18.09                           | 0.773       | 17.50      |
|                | Average                | 1.245±0.010  | 17.61±0.21                      | 0.770±0.011 | 17.11±0.21 |

[a] The average data based on 20 cells.

Table S3 The corresponding statistical data in Fig. 2e of reported CsPbI<sub>3</sub> QD solar cells.

| Publication Date | PCE (%) | Reference                                                               |
|------------------|---------|-------------------------------------------------------------------------|
| May. 25, 2020    | 15.21   | <i>Adv. Mater.</i> <b>2020</b> , 32, 2001906 <sup>1</sup>               |
| Oct. 21, 2020    | 16.07   | <i>Adv. Funct. Mater.</i> <b>2021</b> , 31, 2005930 <sup>2</sup>        |
| Jan. 20, 2021    | 15.10   | <i>Nat. Commun.</i> <b>2021</b> , 12, 466 <sup>3</sup>                  |
| Apr. 19, 2021    | 15.05   | <i>Adv. Funct. Mater.</i> <b>2021</b> , 31, 2101272 <sup>4</sup>        |
| Jul. 9, 2021     | 16.21   | <i>Energy Environ. Sci.</i> <b>2021</b> , 14, 4599-4609 <sup>5</sup>    |
| Oct. 25, 2021    | 15.29   | <i>Adv. Mater.</i> <b>2022</b> , 34, 2105977 <sup>6</sup>               |
| Oct. 27, 2021    | 15.21   | <i>Adv. Funct. Mater.</i> <b>2022</b> , 32, 2108615 <sup>7</sup>        |
| Jun. 20, 2022    | 16.53   | <i>Joule</i> <b>2022</b> , 6, 1-22 <sup>8</sup>                         |
| Jul. 30, 2022    | 16.25   | <i>Adv. Mater.</i> <b>2022</b> , 2204259 <sup>9</sup>                   |
| Aug. 16, 2022    | 16.64   | <i>Energy Environ. Sci.</i> , <b>2022</b> , 15, 4201-4212 <sup>10</sup> |
| Jan. 17, 2023    | 16.14   | <i>Adv. Funct. Mater.</i> <b>2023</b> , 2210728 <sup>11</sup>           |
| Feb. 26 2023     | 15.38   | <i>Adv. Mater.</i> <b>2023</b> , 2212160 <sup>12</sup>                  |

|               |              |                                                                                                                   |
|---------------|--------------|-------------------------------------------------------------------------------------------------------------------|
| Jun. 4, 2023  | 15.40        | <i>Adv. Sci.</i> <b>2023</b> , <i>10</i> , 2301793 <sup>13</sup>                                                  |
| Jun. 29, 2023 | 15.72        | <i>Nano-Micro Lett.</i> <b>2023</b> <i>15</i> :163 <sup>14</sup>                                                  |
| Sep. 20, 2023 | 15.88        | <i>Adv. Mater.</i> <b>2024</b> , <i>36</i> , 2306854 <sup>15</sup>                                                |
| May. 18, 2024 | 16.44        | <i>Adv. Mater.</i> <b>2024</b> , 2404495 <sup>16</sup>                                                            |
| Jul. 19, 2024 | 16.10        | <i>ACS Energy Lett.</i> <b>2024</b> , <i>9</i> , 3970–3981 <sup>17</sup>                                          |
| Aug. 13, 2024 | 16.06        | <i>Nat. Energy</i> <b>2024</b> .                                                                                  |
|               |              | <a href="https://doi.org/10.1038/s41560-024-01608-5">https://doi.org/10.1038/s41560-024-01608-5</a> <sup>18</sup> |
| <b>2024</b>   | <b>17.50</b> | <b>This work</b>                                                                                                  |

Table S4 The detailed  $J-V$  parameters of devices with CyP-TiO<sub>2</sub> and LiP-TiO<sub>2</sub>.

| Sample               | $V_{OC}$ (V) | $J_{SC}$ (mA cm <sup>-2</sup> ) | FF    | PCE (%) |
|----------------------|--------------|---------------------------------|-------|---------|
| CyP-TiO <sub>2</sub> | 1.251        | 17.89                           | 0.778 | 17.40   |
| LiP-TiO <sub>2</sub> | 1.251        | 17.32                           | 0.741 | 16.07   |

Table S5 Fitted TRPL parameters of the QD films deposited on the TiO<sub>2</sub>/FTO substrates.

| Sample               | A <sub>1</sub> | $\tau_1$ (ns) | A <sub>2</sub> | $\tau_2$ (ns) | A <sub>3</sub> | $\tau_3$ (ns) | $\tau_{ave}$ (ns) |
|----------------------|----------------|---------------|----------------|---------------|----------------|---------------|-------------------|
| TiO <sub>2</sub>     | 0.82           | 0.615         | 0.16           | 2.207         | 0.02           | 7.429         | 2.06              |
| CyP-TiO <sub>2</sub> | 0.87           | 0.524         | 0.12           | 1.841         | 0.01           | 5.693         | 1.31              |

Table S6 Fitted TRPL parameters of the QD films deposited on the quartz substrates.

| Sample  | A <sub>1</sub> | $\tau_1$ (ns) | A <sub>2</sub> | $\tau_2$ (ns) | A <sub>3</sub> | $\tau_3$ (ns) | $\tau_{ave}$ (ns) |
|---------|----------------|---------------|----------------|---------------|----------------|---------------|-------------------|
| QDs     | 0.73           | 1.038         | 0.25           | 4.750         | 0.02           | 19.535        | 6.38              |
| CyP-QDs | 0.77           | 0.918         | 0.21           | 3.742         | 0.02           | 13.354        | 4.05              |

Table S7 The detailed  $J-V$  parameters of CsPbI<sub>3</sub> QD solar cells with different recycled TiO<sub>2</sub> substrates (the average data based on 10 cells).

| Substrate        | Recycled times |                        | $V_{OC}$ (V) | $J_{SC}$ (mA cm <sup>-2</sup> ) | FF     | PCE (%) | Percentage Remaining |
|------------------|----------------|------------------------|--------------|---------------------------------|--------|---------|----------------------|
| TiO <sub>2</sub> | Fresh          | Champion               | 1.251        | 16.69                           | 0.738  | 15.42   | 100%                 |
|                  |                | Average <sup>[b]</sup> | 1.244        | 16.28                           | 0.723  | 15.11   |                      |
|                  |                |                        | ±0.015       | ±0.48                           | ±0.020 | ±0.38   |                      |
|                  | R1             | Champion               | 1.251        | 15.87                           | 0.716  | 14.18   | 92.0%                |
|                  |                | Average                | 1.241        | 15.19                           | 0.701  | 13.79   |                      |
|                  |                |                        | ±0.018       | ±0.55                           | ±0.025 | ±0.66   |                      |
|                  | R2             | Champion               | 1.251        | 15.38                           | 0.695  | 13.37   | 86.7%                |
|                  |                | Average                | 1.238        | 14.84                           | 0.683  | 12.74   |                      |
|                  |                |                        | ±0.022       | ±0.69                           | ±0.033 | ±0.78   |                      |
|                  | R3             | Champion               | 1.251        | 15.59                           | 0.660  | 12.87   | 83.5%                |
|                  |                | Average                | 1.230        | 14.65                           | 0.646  | 12.74   |                      |

|                            |              |          |             |            |             |            |       |
|----------------------------|--------------|----------|-------------|------------|-------------|------------|-------|
|                            |              |          | $\pm 0.028$ | $\pm 0.73$ | $\pm 0.038$ | $\pm 0.99$ |       |
|                            | <b>R4</b>    | Champion | 1.186       | 15.09      | 0.630       | 11.28      | 73.2% |
|                            |              | Average  | 1.109       | 14.14      | 0.605       | 10.67      |       |
|                            |              |          | $\pm 0.035$ | $\pm 0.89$ | $\pm 0.046$ | $\pm 1.12$ |       |
|                            | <b>Fresh</b> | Champion | 1.251       | 17.94      | 0.762       | 17.12      | 100%  |
|                            |              | Average  | 1.245       | 17.52      | 0.758       | 16.94      |       |
|                            |              |          | $\pm 0.010$ | $\pm 0.22$ | $\pm 0.011$ | $\pm 0.22$ |       |
|                            | <b>R1</b>    | Champion | 1.251       | 17.43      | 0.769       | 16.77      | 98.0% |
|                            |              | Average  | 1.242       | 17.12      | 0.755 $\pm$ | 16.60      |       |
|                            |              |          | $\pm 0.010$ | $\pm 0.26$ | 0.012       | $\pm 0.31$ |       |
| <b>CyP-TiO<sub>2</sub></b> | <b>R2</b>    | Champion | 1.251       | 17.07      | 0.775       | 16.56      | 96.7% |
|                            |              | Average  | 1.241       | 16.84      | 0.768 $\pm$ | 16.24      |       |
|                            |              |          | $\pm 0.013$ | $\pm 0.31$ | 0.016       | $\pm 0.50$ |       |
|                            | <b>R3</b>    | Champion | 1.251       | 16.86      | 0.762       | 16.08      | 93.9% |
|                            |              | Average  | 1.237       | 16.32      | 0.757 $\pm$ | 15.66      |       |
|                            |              |          | $\pm 0.016$ | $\pm 0.36$ | 0.020       | $\pm 0.67$ |       |
|                            | <b>R4</b>    | Champion | 1.235       | 16.76      | 0.753       | 15.60      | 91.1% |
|                            |              | Average  | 1.223       | 16.12      | 0.743 $\pm$ | 15.14      |       |
|                            |              |          | $\pm 0.021$ | $\pm 0.48$ | 0.029       | $\pm 0.84$ |       |

### Supplementary Note 1:

#### Methods of exposing buried interfaces

Glass slices coated with a UV curable glue was used to encapsulate the QD film, after curing with UV light, followed by glass separation from FTO substrates with a nipping plier.

#### References:

- 1 X. Ling, J. Yuan, X. Zhang, Y. Qian, S. M. Zakeeruddin, B. W. Larson, Q. Zhao, J. Shi, J. Yang, K. Ji, Y. Zhang, Y. Wang, C. Zhang, S. Duhm, J. M. Luther, M. Grätzel and W. Ma, *Adv Mater.*, 2020 **32**, 2001906.
- 2 L. Zhang, C. Kang, G. Zhang, Z. Pan, Z. Huang, S. Xu, H. Rao, H. Liu, S. Wu, X. Wu, X. Li, Z. Zhu and X. Zhong, *Adv. Funct. Mater.*, 2021, **31**, 2005930.
- 3 L. Hu, Q. Zhao, S. Huang, J. Zheng, X. Guan, R. Patterson, J. Kim, L. Shi, C.-H. Lin, Q. Lei, D. Chu, W. Tao, S. Cheong, R. D. Tilley, A. W. Y. Ho-Baillie, J. M. Luther, J. Yuan and T. Wu, *Nat. Commun.*, 2021, **12**, 466.
- 4 J. Yuan, X. Zhang, J. Sun, R. Patterson, H. Yao, D. Xue, Y. Wang, K. Ji, L. Hu, S. Huang, D. Chu, T. Wu, J. Hou and J. Yuan, *Adv. Funct. Mater.*, 2021, **31**, 2101272.
- 5 D. Jia, J. Chen, R. Zhuang, Y. Hua, and X. Zhang, *Energy Environ. Sci.*, 2022, **15**, 4201–4212.
- 6 X. Zhang, H. Huang, X. Ling, J. Sun, X. Jiang, Y. Wang, D. Xue, L. Huang, L. Chi, J. Yuan and

- W. Ma, *Adv. Mater.*, 2022, **34**, 2105977.
- 7 Y. Wang, C. Duan, X. Zhang, J. Sun, X. Ling, J. Shi, L. Hu, Z. Zhou, X. Wu, W. Han, X. Liu, C. Cazorla, D. Chu, S. Huang, T. Wu, J. Yuan and W. Ma, *Adv. Funct Mater.*, 2022, **32**, 2108615.
- 8 D. Jia, J. Chen, J. Qiu, H. Ma, M. Yu, J. Liu, and X. Zhang, *Joule* 2022, **6**, 1632–1653/
- 9 J. Chen, D. Jia, R. Zhuang, Y. Hua and X. Zhang, *Adv. Mater.*, 2022, **34**, 2204259.
- 10 D. Jia, J. Chen, R. Zhuang, Y. Hua and X. Zhang, *Energy Environ. Sci.*, 2022, **15**, 4201–4212.
- 11 H. Huang, X. Zhang, R. Gui, C. Zhao, J. Guo, Y. M. Maung, H. Yin, W. Ma and J. Yuan, *Adv Funct Mater.*, 2023 2210728.
- 12 D. Jia, J. Chen, R. Zhuang, Y. Hua and X. Zhang, *Adv. Mater.*, 2023, **35**, 2212160.
- 13 S. Han, G. Seo, T. Yong, S. Choi, Y. Kim and J. Choi, *Adv. Sci.*, 2023, **10**, 2301793.
- 14 J. Shi, B.C. Kleinstein, X. Zhang, C. Zhao, Y. Zhang, X. Ling, J. Guo, D.H. Ko, B. Xu, J. Yuan, and W. Ma, *Nano-Micro Lett.*, 2023. 15, 163.
- 15 J. Chen, D. Jia, R. Zhuang, Y. Hua and X. Zhang, *Adv. Mater.*, 2024, **36**, 2306854.
- 16 J. Chen, L. Ye, T. Wu, Y. Hua and X. Zhang, *Adv. Mater.*, 2024, **36**, 2404495.
- 17 L. Hu, X. Guan, H. Huang, T. Ye, J. Ding, A. Aarti, K. Venkatesan, W. Wang, F. Chen, C.-H. Lin, T. Wan, M. Li, J. Yi, R. Zheng, D. Chu, S. Cai, J. Chen, C. Cazorla, J. Yuan, Y. Bai, T. Wu and S. Huang, *ACS Energy Lett.*, 2024, **9**, 3970–3981.
- 18 X. Zhang, H. Huang, C. Zhao, L. Jin, C. Lee, Y. Li, D. Ko, W. Ma, T. Wu, and J. Yuan, *Nat. Energy*. 2024, <https://doi.org/10.1038/s41560-024-01608-5>.
